# Supplementary material
Source: MDPI journal article supplement (https://www.mdpi.com/1424-8247/15/5/540)
Supplement: s1 [file s1]

# Supplementary Information

## Design of L and D-amino acids SARS-CoV-2 3CL protease inhibitors using the cationic peptide from rattlesnake venom as a scaffold

Raphael J. Eberle<sup>1,2</sup>, Ian Gering<sup>1</sup>, Markus Tusche<sup>1</sup>, Philipp N. Ostermann<sup>3</sup>, Lisa Müller<sup>3</sup>, Ortwin Adams<sup>3</sup>, Heiner Schaal<sup>3</sup>, Danilo S. Olivier<sup>4</sup>, Marcos S. Amaral<sup>5</sup>, Raghuvir K. Arni<sup>6</sup>, Dieter Willbold<sup>1,2,7</sup>, Mônica A. Coronado<sup>1,\*</sup>

<sup>1</sup>Institute of Biological Information Processing (IBI-7: Structural Biochemistry), Forschungszentrum Jülich, Jülich, Germany.

<sup>2</sup>Institut für Physikalische Biologie, Heinrich-Heine-Universität Düsseldorf, Universitätsstraße, Düsseldorf, Germany.

<sup>3</sup>Institute of Virology, Medical Faculty, University Hospital Düsseldorf, Heinrich-Heine-Universität, Düsseldorf, Germany.

<sup>4</sup>Campus Cimba, Federal University of Tocantins, Araguaína, TO 77824-838, Brazil.

<sup>5</sup>Institute of Physics, Federal University of Mato Grosso do Sul, Campo Grande, MS 79070-900, Brazil

<sup>6</sup>Multiuser Center for Biomolecular Innovation, IBILCE, Universidade Estadual Paulista (UNESP), São José do Rio Preto-SP, Brazil.

<sup>7</sup>JuStruct: Jülich Centre for Structural Biology, Forschungszentrum Jülich, Jülich, Germany.

\* Correspondence to [m.coronado@fz-juelich.de](mailto:m.coronado@fz-juelich.de)

### Table of contents

**Figure S1.** Purification of SARS-Cov-2 3CL<sup>pro</sup>.

**Figure S2.** Primary structure of L-CDP1 to L-CDP5.

**Figure S3.** Primary structure of L-CDP6 to L-CDP9.

**Figure S4.** Inhibition effect of Crotamine and L-CDPs over SARS-CoV-2 3CL<sup>pro</sup>.

**Figure S5.** Crotamine and L-CDPs with inhibitory activity against SARS-CoV-2 3CL<sup>pro</sup>.

**Figure S6.** Circular dichroism (CD) spectroscopy of L-CDP1, L-CDP2, L-CDP7 and CDP8.

**Figure S7.** K<sub>D</sub> determination of L-CDP1 and L-CDP7 binding to SARS-CoV-2 3CL<sup>pro</sup> using SPR.

**Figure S8.** Stability of L- and D-CDPs against Pepsin hydrolysis.

**Figure S9.** K<sub>D</sub> determination of D-CDP1 and D-CDP7 binding to SARS-CoV-2 3CL<sup>pro</sup> using MST.

**Figure S10.** K<sub>D</sub> determination of L-CDP1 and L-CDP7 binding to SARS-CoV-2 3CL<sup>pro</sup> using MST.

**Figure S11.** H<sub>2</sub>O<sub>2</sub> generating capacity of L- and D-CDP1, CDP7 under the influence of 1 mM TCEP.

**Figure S12.** Effect of Triton X-100 on the L- and D-CDP1, CDP7 inhibition against SARS-CoV-2 3CL<sup>pro</sup>.

**Figure S13.** 24 h inhibition experiment of L- and D-CDP1, CDP7 against SARS-CoV-2 3CL<sup>pro</sup>.

**Figure S14.** Time-dependent modifications of the 3CL<sup>pro</sup>/L- D-CDP1 complex.

**Figure S15.** Intermolecular H-bonds of the replicates MD simulations.

**Figure S16.** HPLC chromatogram of the L-CDP and D-CDP peptides.

**Figure S17.** HPLC chromatogram of the L/D-CDP1 and L/D-CDP7 peptides after the labeling process with CF633-NHS.

**Table S1.** K<sub>D</sub> determination of L-CDP1 and L-CDP7 using SPR.

**Table S2.** Basic information about tested L- and D-CDPs.

**Table S3.** K<sub>D</sub> determination of L/D-CDP1 and L/D-CDP7 using MST.

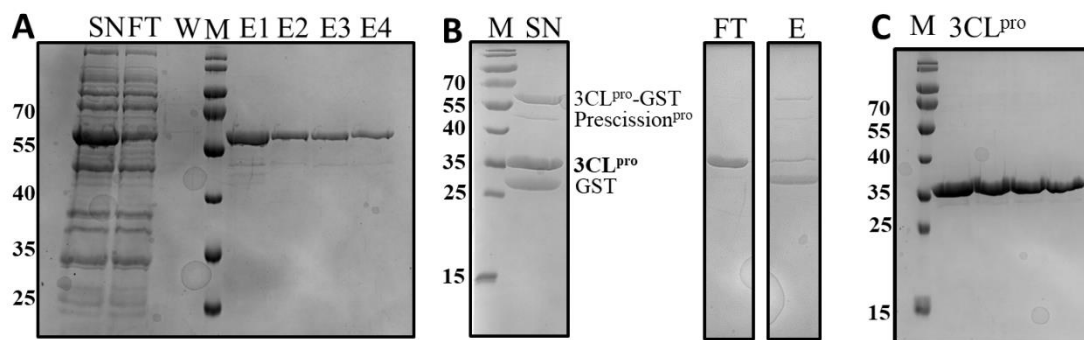

**Figure S1.** Purification of SARS-Cov-2 3CL<sup>pro</sup>. **A:** SDS 15% Gel of 3CL<sup>pro</sup>\_GST purification with GSH sepharose. SN: supernatant, FT: flow-through, W: washing step, M: protein marker, E1-E4: Elution. **B:** SDS 15% Gel of the 3CL<sup>pro</sup>\_GST fusion protein cleavage by PreScission<sup>pro</sup>. M: protein marker. SN: cleaving approach, containing 3CL<sup>pro</sup>\_GST, PreScission<sup>pro</sup>, 3CL<sup>pro</sup> and GST. FT: contain 3CL<sup>pro</sup>, E: elution step including uncleaved 3CL<sup>pro</sup>\_GST, PreScission<sup>pro</sup> and GST tag. **C:** SDS 15% Gel of pure 3CL<sup>pro</sup>.

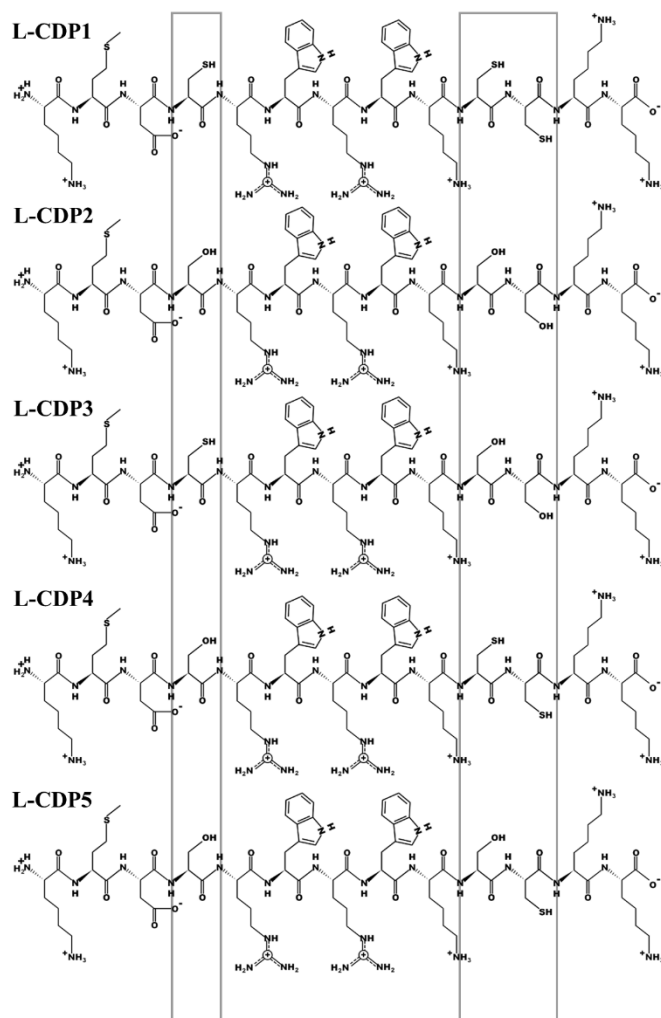

**Figure S2.** Primary structure of L-CDP1 to L-CDP5. Grey boxes label the amino acid variation in the sequences.

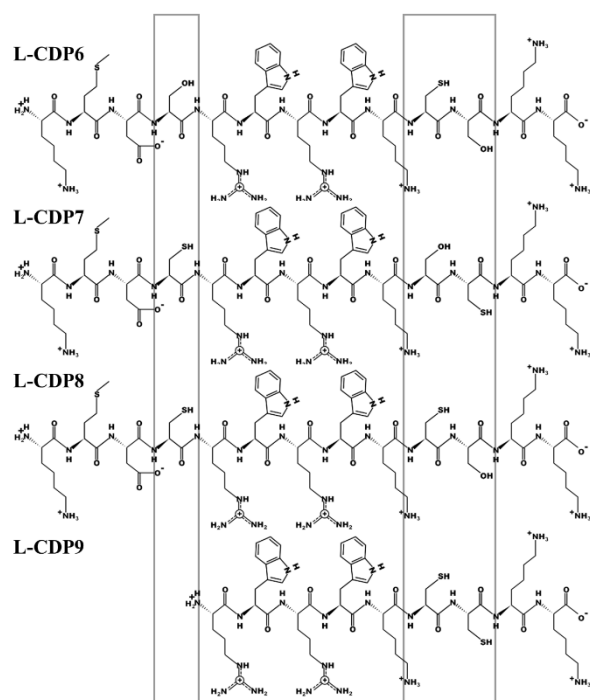

**Figure S3.** Primary structure of L-CDP6 to L-CDP9. Grey boxes label the amino acid variation in the sequences.

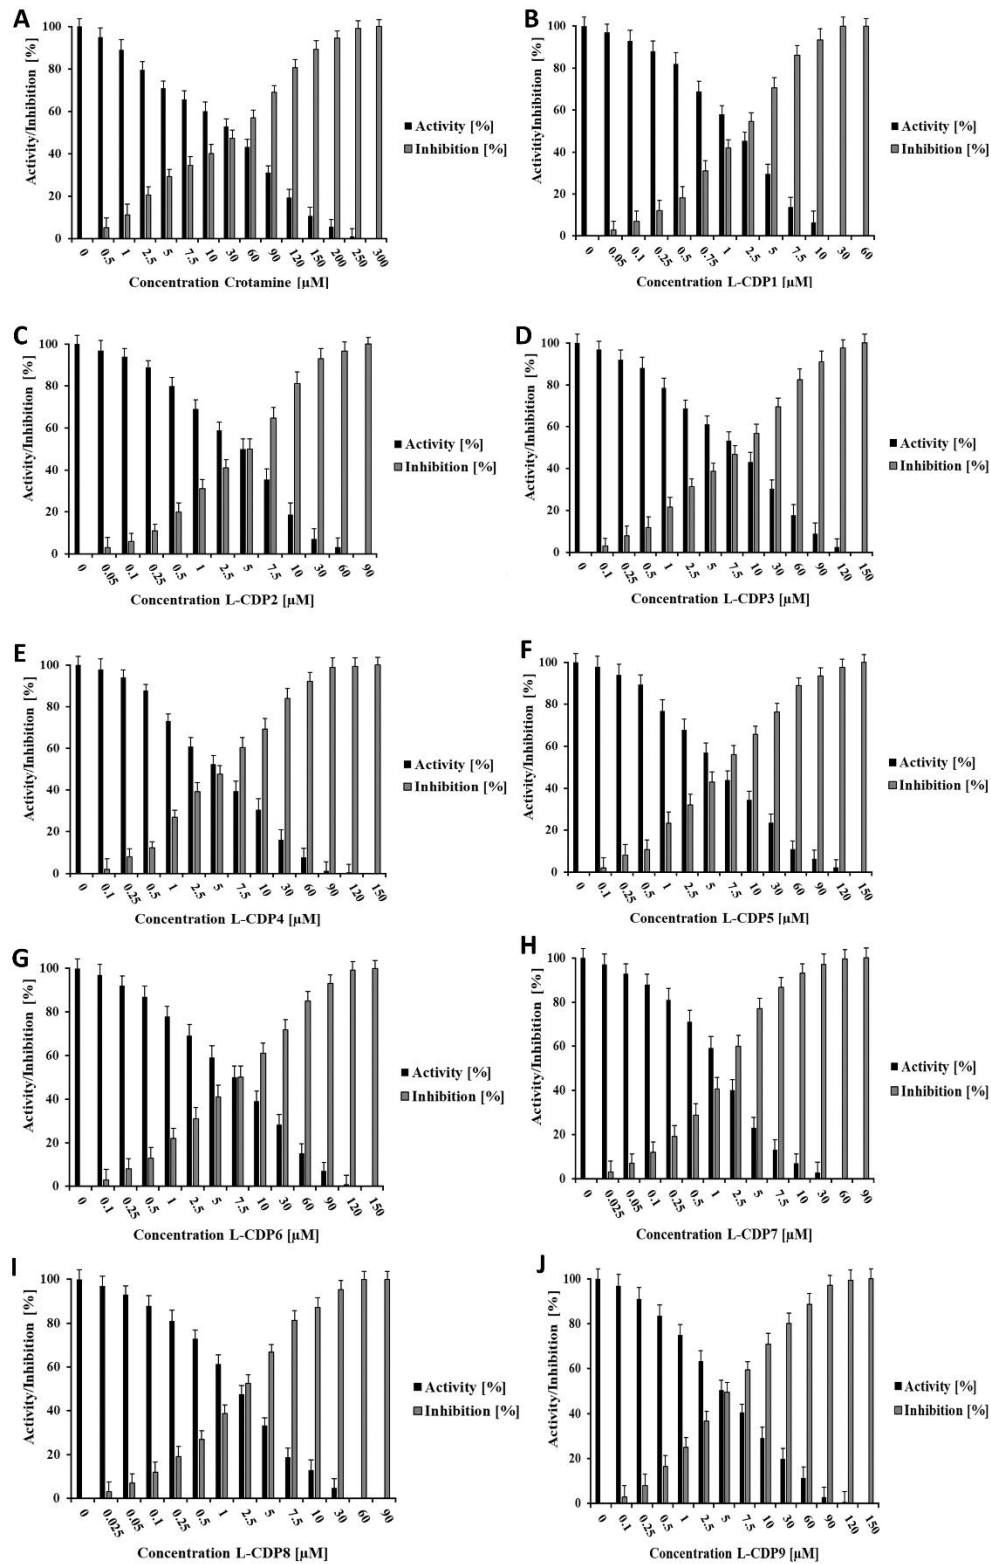

**Figure S4.** Inhibition effect of Crotonamine and L-CDPs over SARS-CoV-2 3CL<sup>pro</sup>. Normalized activity and inhibition of SARS-CoV-2 3CL<sup>pro</sup> under inhibitor influence. **A:** Crotonamine, **B:** L-CDP1, **C:** L-CDP2, **D:** L-CDP3, **E:** L-CDP4 and **F:** L-CDP5, **G:** L-CDP6, **H:** L-CDP7, **I:** L-CDP8 and **J:** L-CDP9. Data showed are the mean  $\pm$  SD from three independent measurements (n=3).

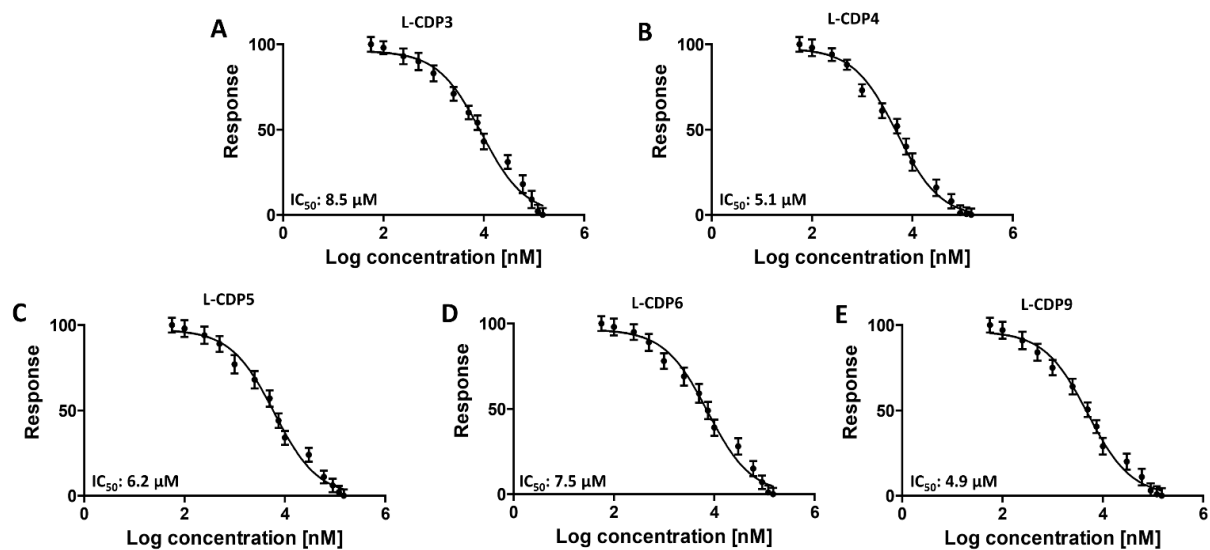

**Figure S5.** Crotamine and L-CDPs with inhibitory activity against SARS-CoV-2 3CL<sup>pro</sup>. Dose-response curves for  $IC_{50}$  determination. The normalized response [%] of SARS-CoV-2 3CL<sup>pro</sup> is plotted against the Log of the inhibitor concentration A: L-CDP3, B: L-CDP4, C: L-CDP5, D: L-CDP6, E: L-CDP9. Data shown are the mean  $\pm$  SD from three independent measurements (n=3).

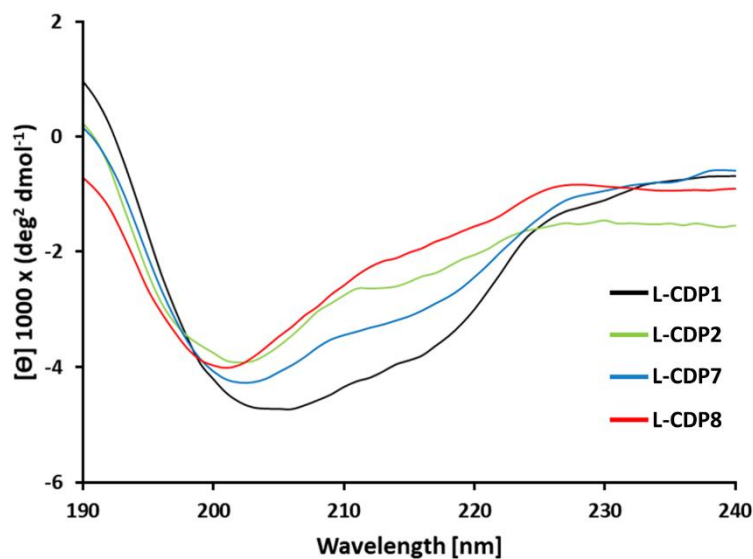

**Figure S6.** Circular dichroism (CD) spectroscopy of L-CDP1, L-CDP2, L-CDP7 and L-CDP8. The CD spectrum of each L-peptide in solution is presented as molar ellipticity  $[\theta]$ .

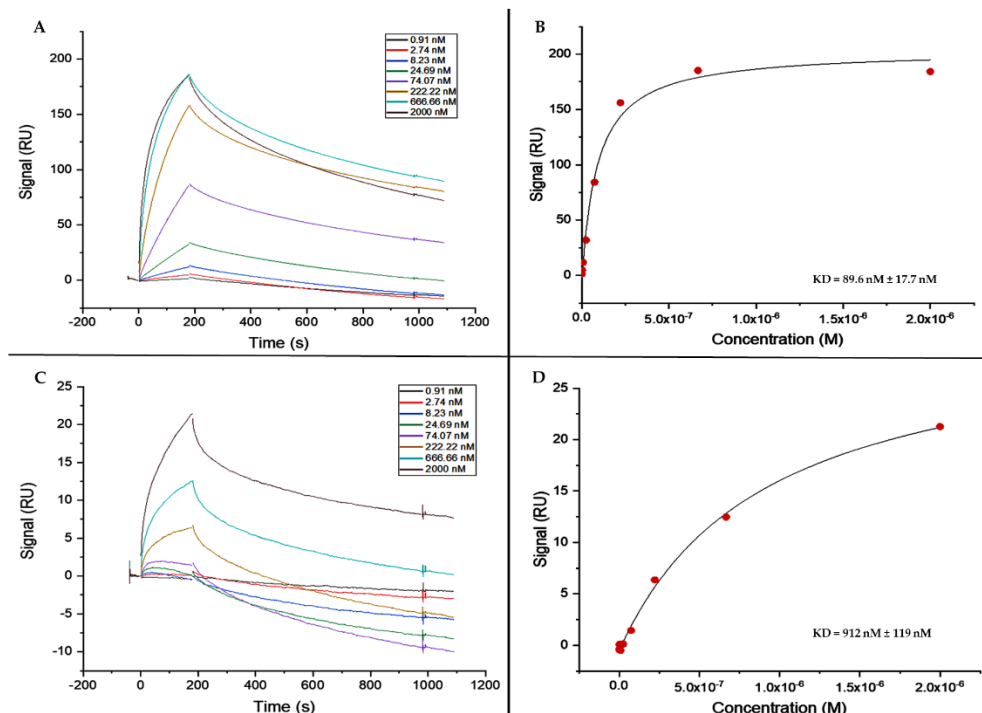

**Figure S7.** Dissociation constant ( $K_D$ ) determination of L-CDP1 and L-CDP7 binding to SARS-CoV-2 3CL<sup>pro</sup> using surface plasmon resonance (SPR). **A:** SPR sensorgram of 3CL<sup>pro</sup> and L-CDP1. **B:** Saturation curve for the L-CDP1 and 3CL<sup>pro</sup> interaction. **C:** SPR sensorgram of 3CL<sup>pro</sup> and L-CDP7. **D:** Saturation curve for the L-CDP7 and 3CL<sup>pro</sup> interaction.

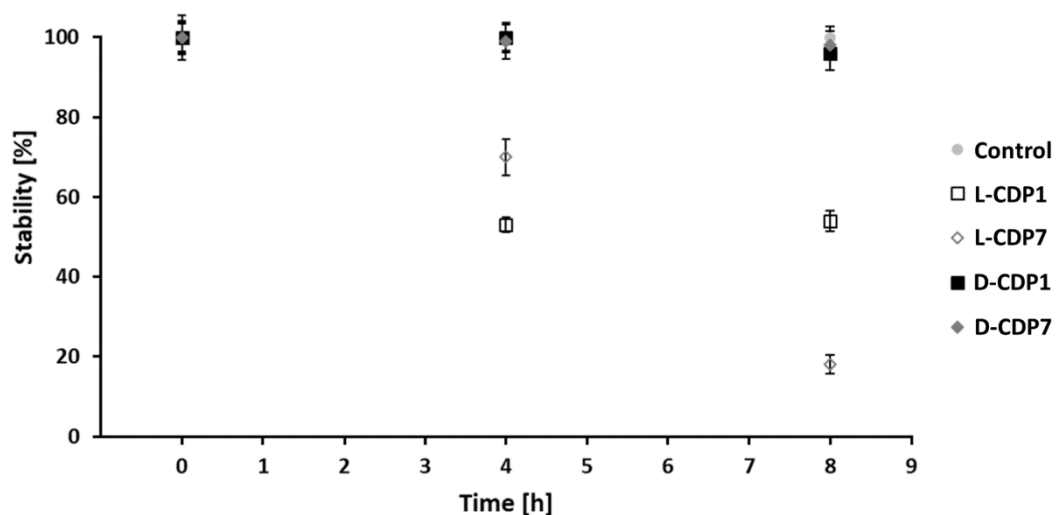

**Figure S8.** Stability of L- and D-CDPs against Pepsin hydrolysis. As a control, a D-peptide was used (RD2), which was described as stable against pepsin digestion [1]. Also, CDP1 and CDP7 D-peptides are stable against pepsin hydrolysis over the experimental time. In contrast, the L-CDP1 amount reduces to around 50% after 8h and L-CDP7 to around 20%.

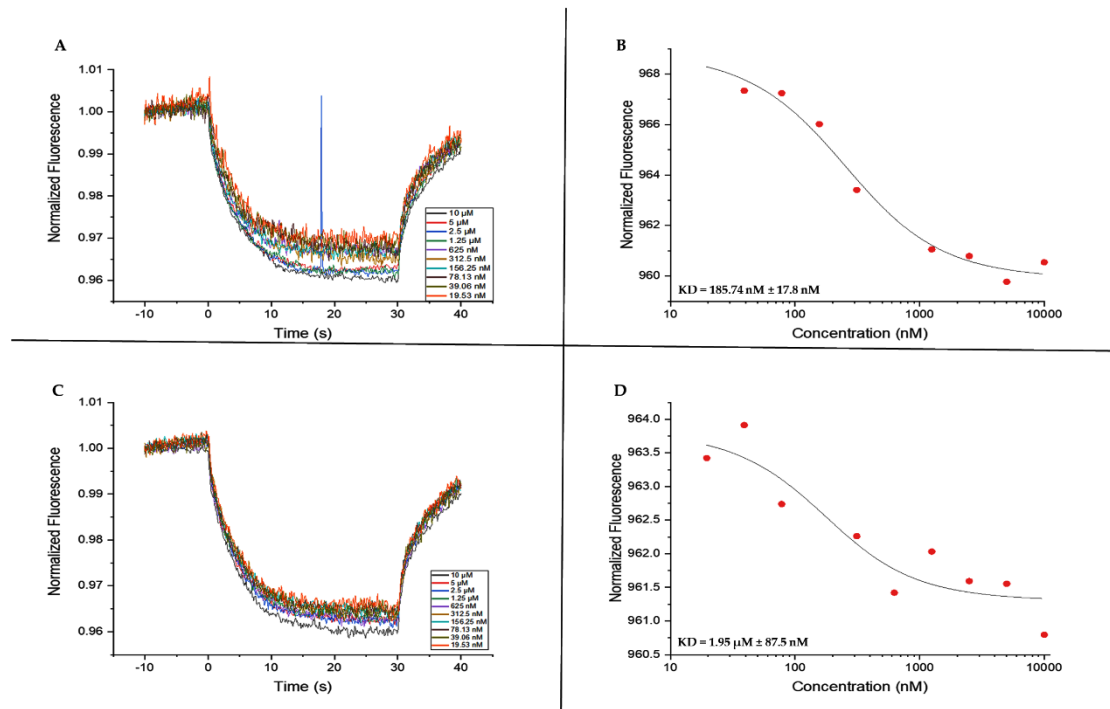

**Figure S9.** Dissociation constant ( $K_D$ ) determination of D-CDP1 and D-CDP7 binding to SARS-CoV-2 3CL<sup>pro</sup> using microscale thermophoresis (MST). **A:** Thermophoresis data from serial dilutions of D-CDP1. **B:** Binding curve of D-CDP1 with SARS-CoV-2 3CL<sup>pro</sup>. **C:** Thermophoresis data from serial dilutions of D-CDP7. **D:** Binding curve of D-CDP7 with SARS-CoV-2 3CL<sup>pro</sup>.

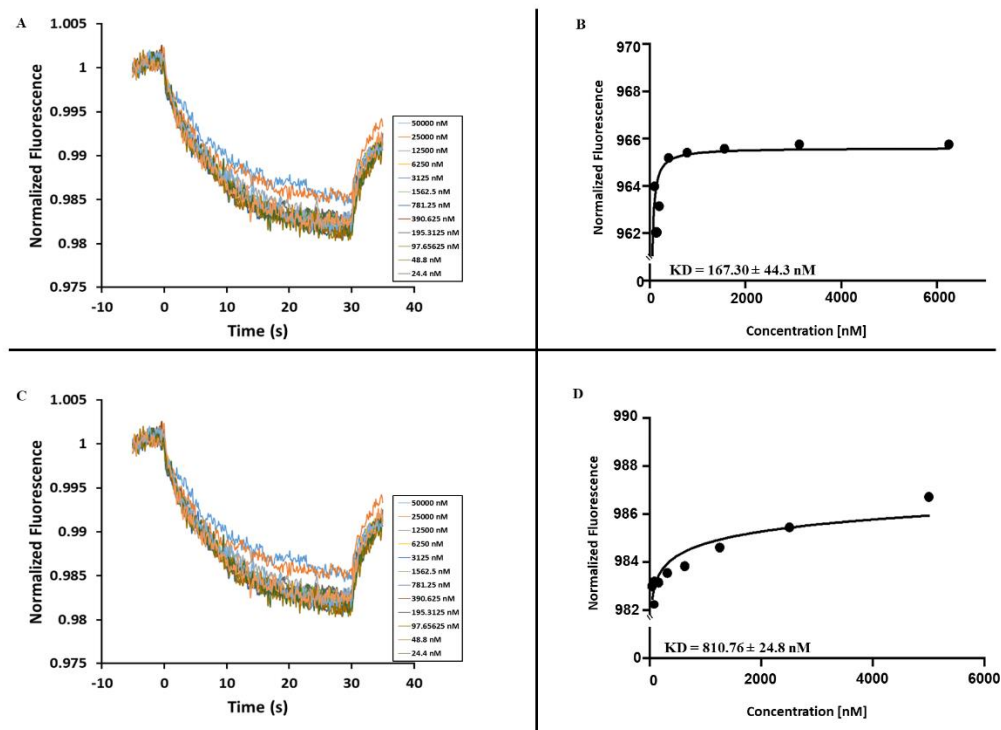

**Figure S10.** Dissociation constant ( $K_D$ ) determination of L-CDP1 and L-CDP7 binding to SARS-CoV-2 3CL<sup>pro</sup> using microscale thermophoresis (MST). **A:** Thermophoresis data from serial dilutions of L-CDP1. **B:** Binding curve of L-CDP1 with SARS-CoV-2 3CL<sup>pro</sup>. **C:** Thermophoresis data from serial dilutions of L-CDP7. **D:** Binding curve of L-CDP7 with SARS-CoV-2 3CL<sup>pro</sup>.

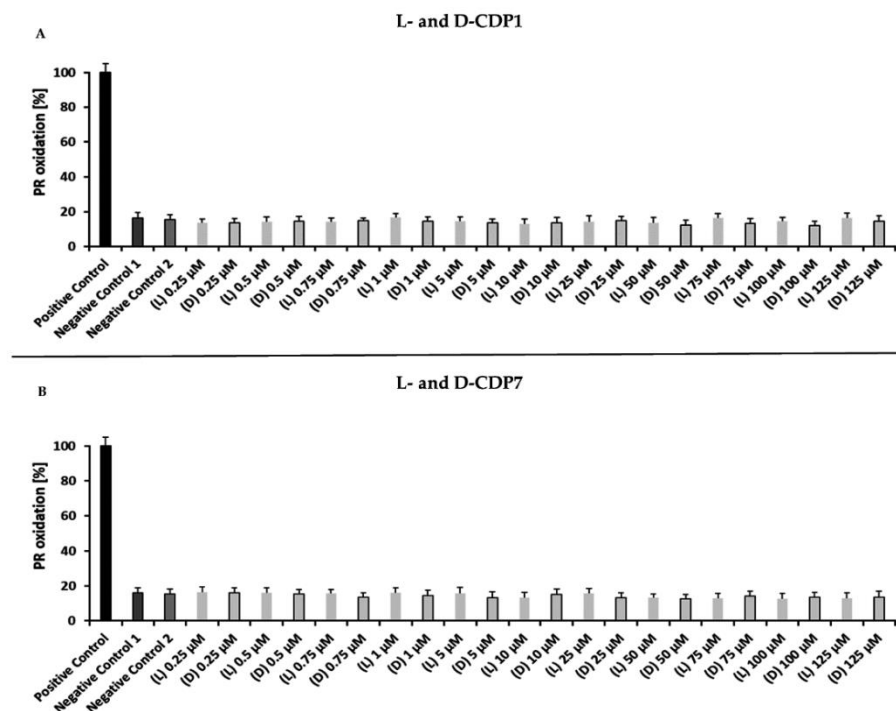

**Figure S11. H<sub>2</sub>O<sub>2</sub> generating capacity of L- and D-CDPs under the influence of 1 mM TCEP.** The experiments were performed to measure the H<sub>2</sub>O<sub>2</sub> generating capacity of L-/D-CDP1 and L-/D-CDP7 under the influence of 1mM TCEP. Further, the H<sub>2</sub>O<sub>2</sub>-dependent horseradish peroxidase (HRP) mediates phenol red (PR) oxidation, which can be followed at 610 nm. Positive control: HRP-PR and H<sub>2</sub>O<sub>2</sub>; negative control 1: HRP-PR; negative control 2: PR; Data showed are the mean  $\pm$  SD from three independent measurements (n=3). **A:** H<sub>2</sub>O<sub>2</sub> generation by L- and D-CDP1. **B:** H<sub>2</sub>O<sub>2</sub> generation by L- and D-CDP7.



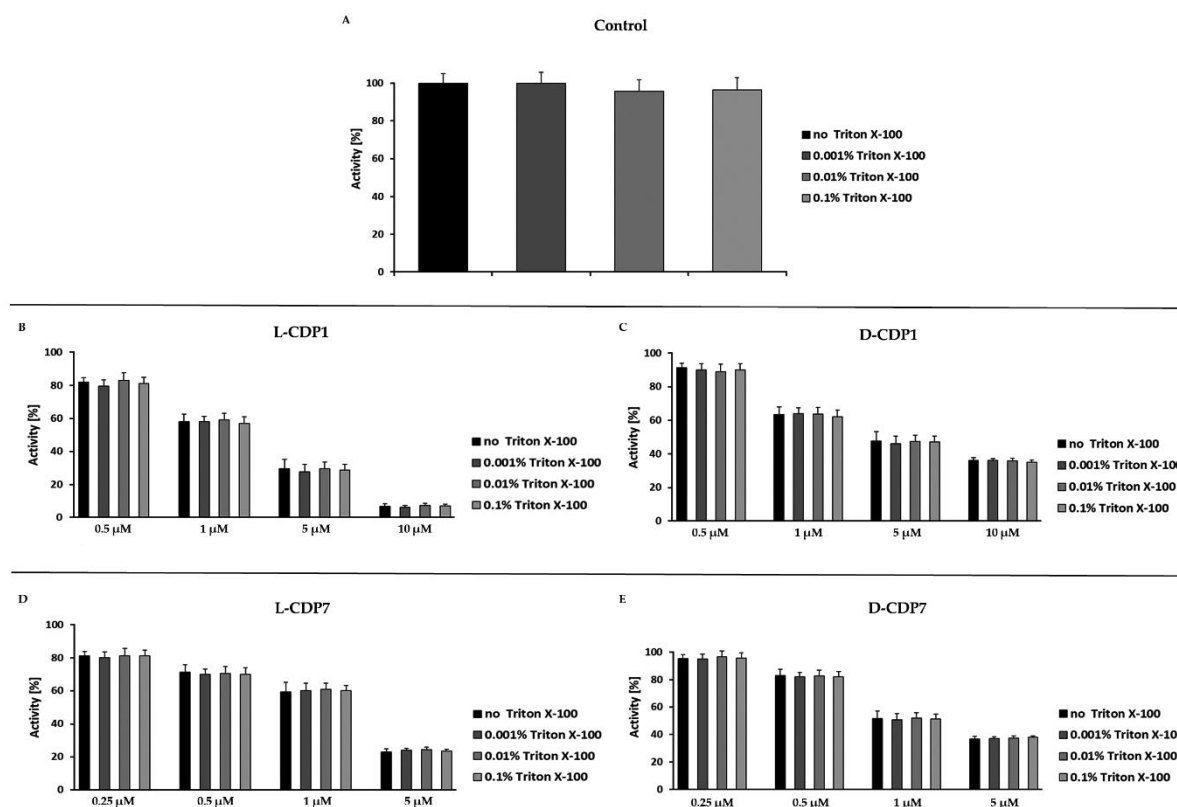

**Figure S12.** Effect of Triton X-100 on the L- and D-CDPs inhibition against SARS-CoV-2 3CL<sup>pro</sup>. The experiments were performed to exclude the possibility that the peptides inhibit the protease promiscuously by aggregation. Three Triton X-100 concentrations (0.001%, 0.01% and 0.1%) were tested with four different inhibitor concentrations and compared without detergent. Additionally, the effect of Triton X-100 against the protease was tested. Data shown are the mean  $\pm$  SD from three independent measurements (n=3). **A:** Effect of Triton X-100 on 3CL<sup>pro</sup> activity. **B:** Effect of Triton X-100 on L-CDP1 inhibition against 3CL<sup>pro</sup>. **C:** Effect of Triton X-100 on D-CDP1 inhibition against 3CL<sup>pro</sup>. **D:** Effect of Triton X-100 on L-CDP7 inhibition against 3CL<sup>pro</sup>. **E:** Effect of Triton X-100 on D-CDP7 inhibition against 3CL<sup>pro</sup>.

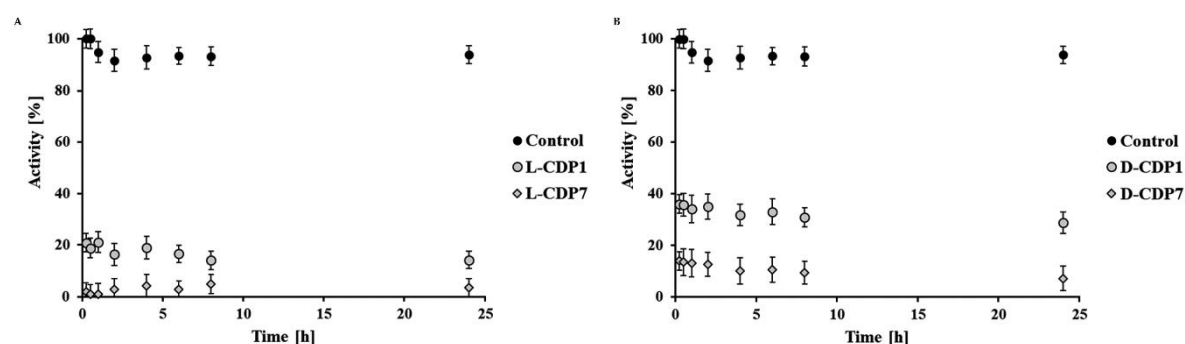

**Figure S13.** 24 h inhibition experiment of L- and D-CDPs against SARS-CoV-2 3CL<sup>pro</sup>. **A:** 24h inhibition experiment of L-CDP1 and L-CDP7 against SARS-CoV-2 3CL<sup>pro</sup>. **B:** 24h inhibition experiment of D-CDP1 and D-CDP7 against SARS-CoV-2 3CL<sup>pro</sup>.

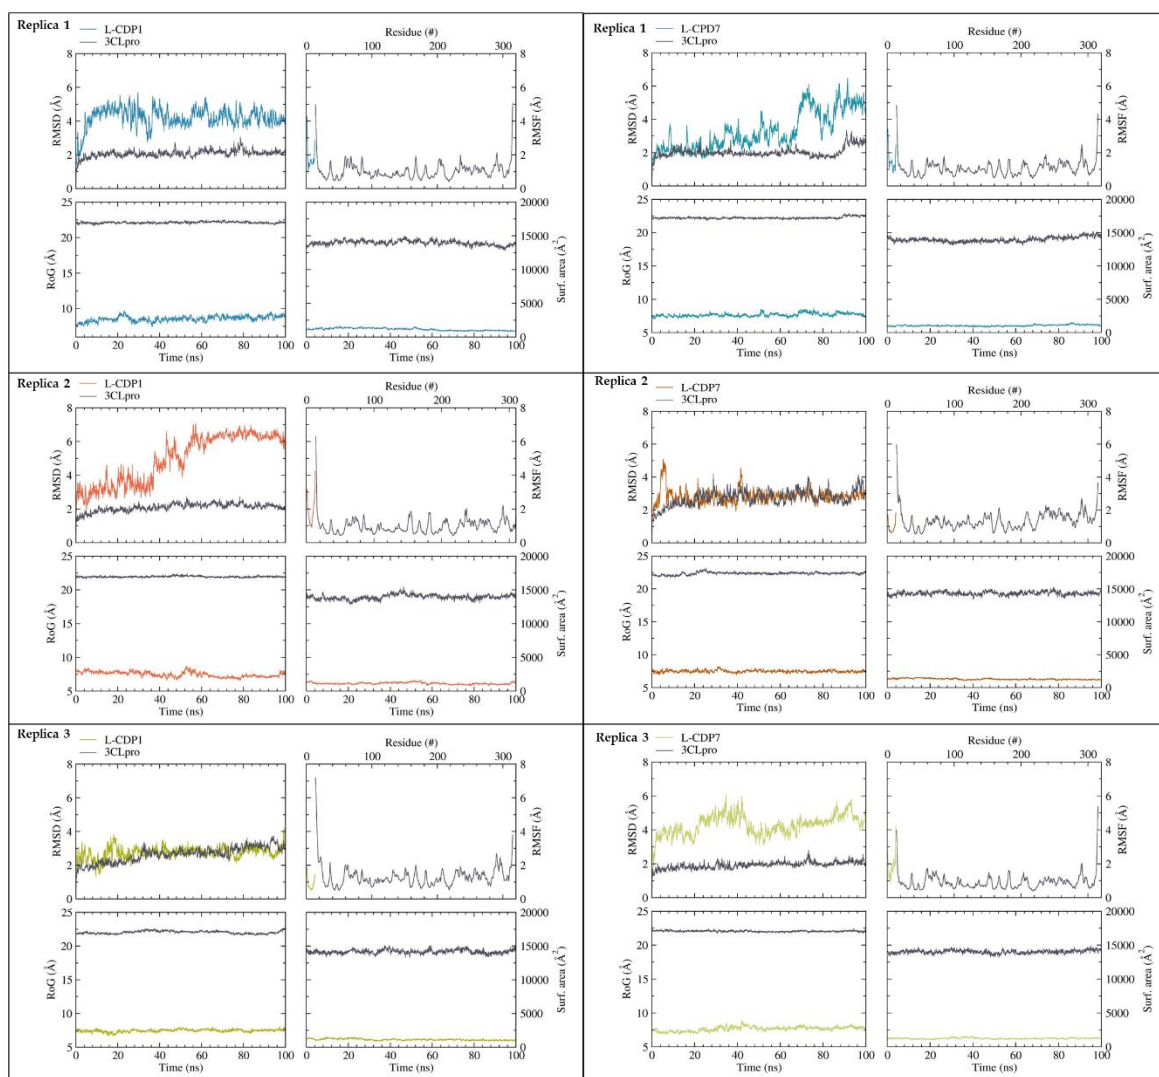

**Figure S14.** RMSD values and RMSF profiles for the replicate 100 ns of MD simulations of 3CL<sup>pro</sup> in complex with L-CDP1 (left) and L-CDP7 (right) peptides. The RMSD time profiles concerning all backbone atoms of 3CL<sup>pro</sup> and the peptides (L-CDP1 and L-CDP7). The RMSF plot corresponds to the protein/peptide complex, and the replicates are coloured differently.

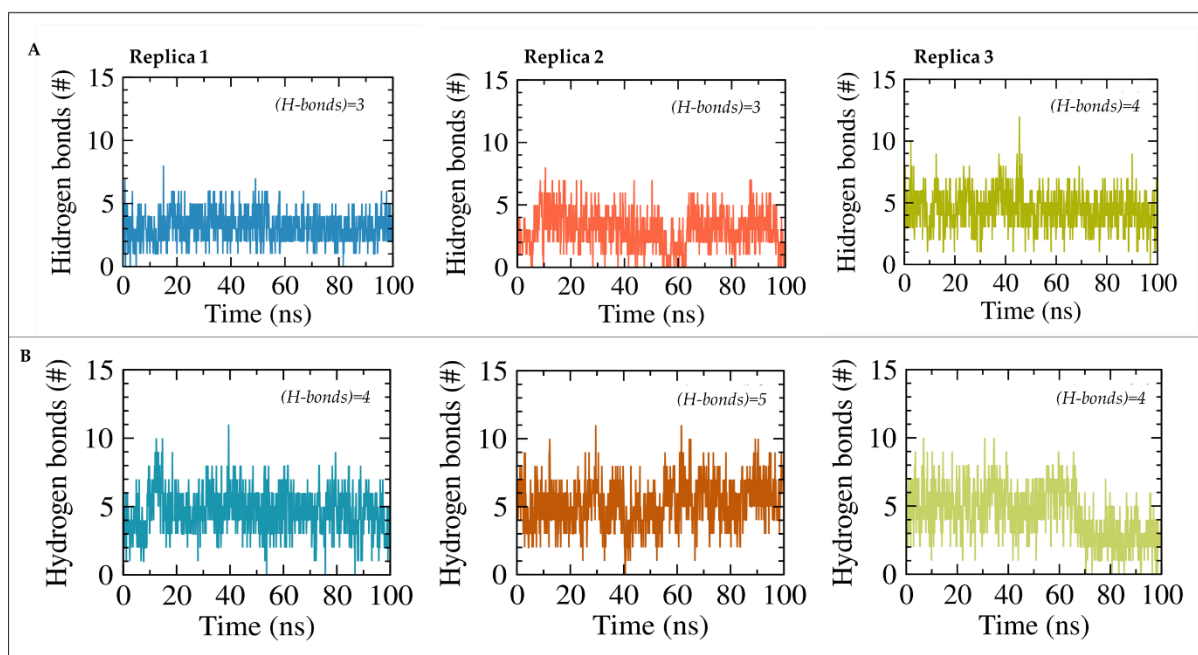

**Figure S15.** Intermolecular H-bonds of the replicates MD simulations: **(A)** H-bonds between the L-CDP1 peptide with 3CL<sup>pro</sup> residues. **(B)** H-bonds between the L-CDP7/ 3CL<sup>pro</sup> residues.

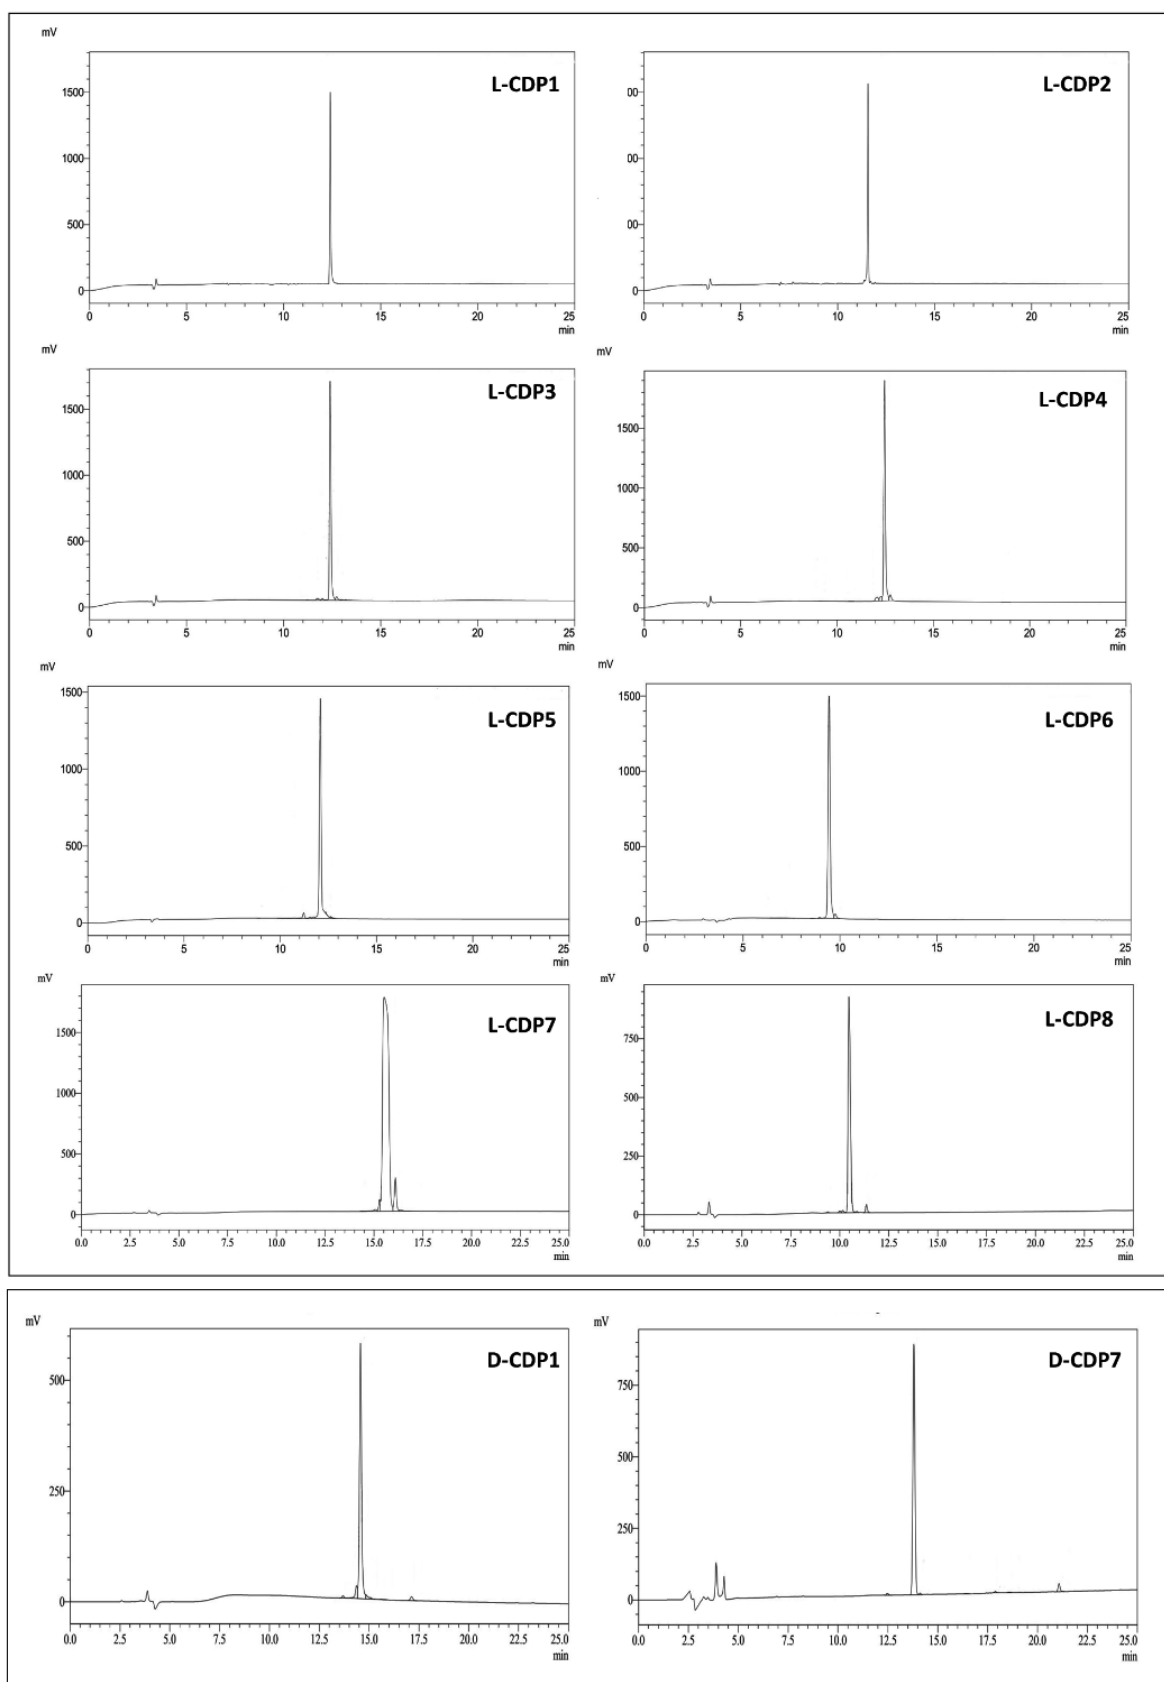

**Figure S16.** HPLC chromatogram of the L-CDP and D-CDP peptides.

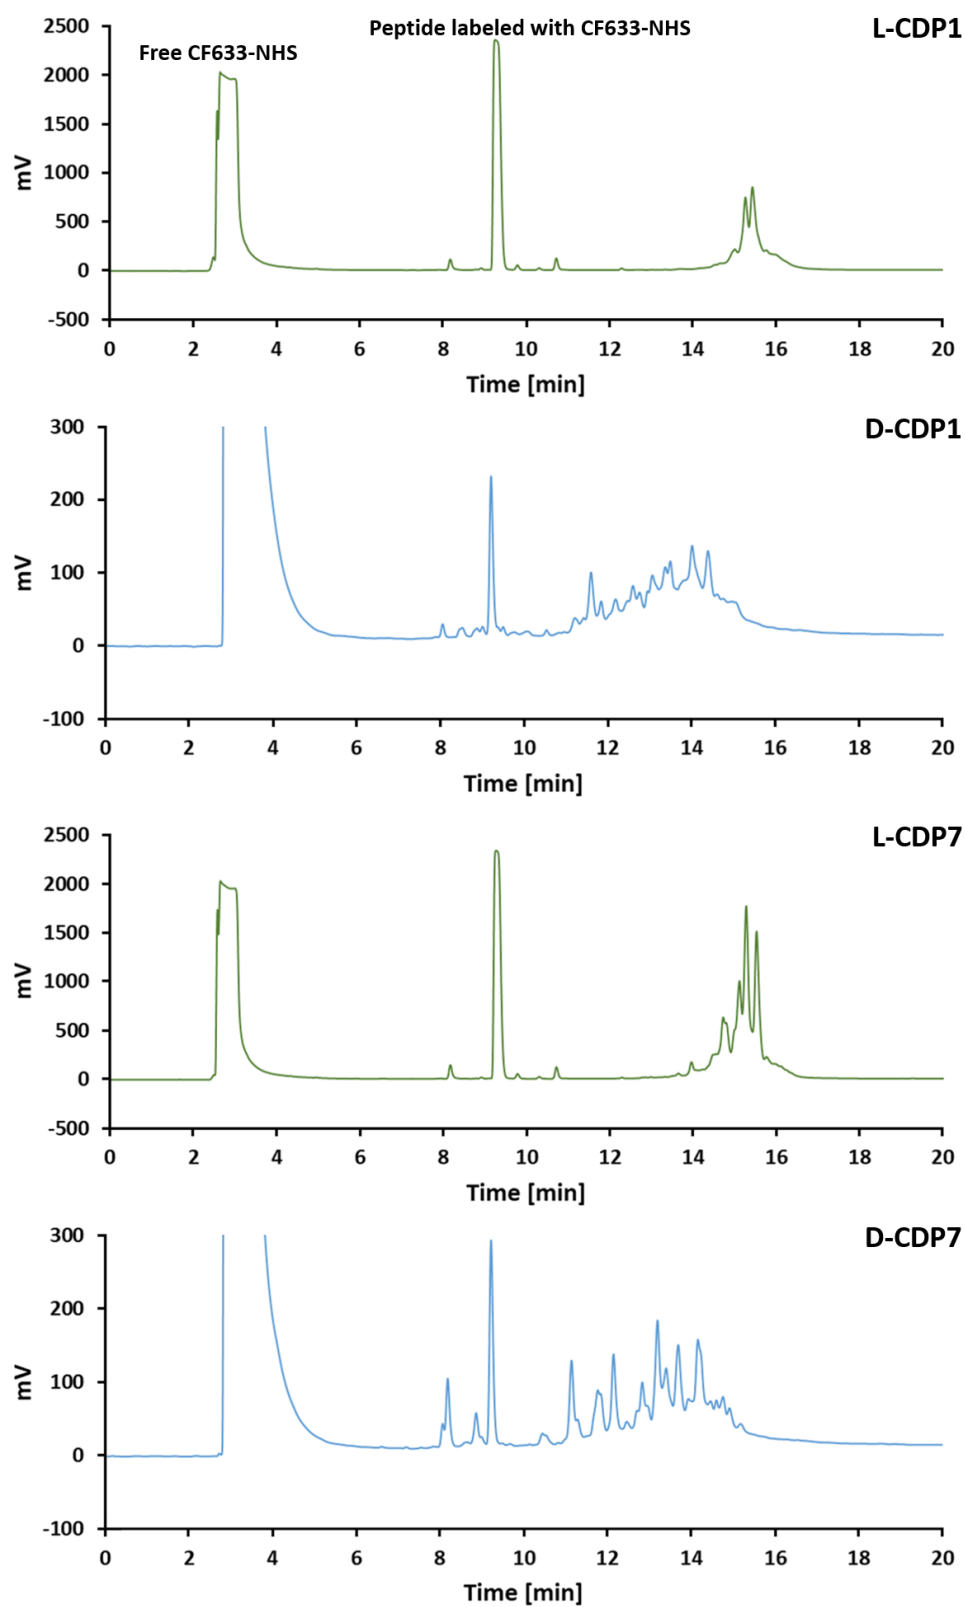

**Figure S17.** HPLC chromatogram of the L/D-CDP1 and L/D-CDP7 peptides after the labelling process with CF633-NHS.

**Table S1.** K<sub>D</sub> determination of L-CDP1 and L-CDP7 using SPR.

| Peptide | K <sub>D</sub> 1 [nM] | K <sub>D</sub> 2 [nM] | Average K <sub>D</sub> [nM] | STD [nM] |
|---------|-----------------------|-----------------------|-----------------------------|----------|
| L-CDP1  | 89.06                 | 40.92                 | 64.99                       | ± 20.07  |
| L-CDP7  | 374.3                 | 233.7                 | 304.0                       | ± 70.3   |

**Table S2.** Basic information about tested L- and D-CDPs.

|      | Sequence      | Conformation | MW      | pI    | Net charge | Solvent          |
|------|---------------|--------------|---------|-------|------------|------------------|
| CDP1 | KMDCRWRWKCKK  | L and D      | 1769.84 | 10.13 | +5         | H <sub>2</sub> O |
| CDP2 | KMDSRWRWKSSKK | L            | 1721.91 | 11.68 | +5         | H <sub>2</sub> O |
| CDP3 | KMDCRWRWKSSKK | L            | 1737.89 | 10.99 | +5         | H <sub>2</sub> O |
| CDP4 | KMDSRWRWKCKK  | L            | 1753.87 | 10.55 | +5         | H <sub>2</sub> O |
| CDP5 | KMDSRWRWKCKK  | L            | 1737.89 | 10.99 | +5         | H <sub>2</sub> O |
| CDP6 | KMDSRWRWKCKK  | L            | 1737.89 | 10.99 | +5         | H <sub>2</sub> O |
| CDP7 | KMDCRWRWKCKK  | L and D      | 1753.87 | 10.55 | +5         | H <sub>2</sub> O |
| CDP8 | KMDCRWRWKCKK  | L            | 1753.87 | 10.55 | +5         | H <sub>2</sub> O |
| CDP9 | RWRWKCKK      | L            | 1292.67 | 10.83 | +5         | H <sub>2</sub> O |

**Table S3.** K<sub>D</sub> determination of D-CDP1 and D-CDP7 using MST.

| Peptide | K <sub>D</sub> 1 [nM] | K <sub>D</sub> 2 [nM] | K <sub>D</sub> 3 [nM] | Average K <sub>D</sub> [nM] | STD [nM] |
|---------|-----------------------|-----------------------|-----------------------|-----------------------------|----------|
| L-CDP1  | 113                   | 221.5                 | 167.4                 | 167.30                      | ± 44.3   |
| L-CDP7  | 451.3                 | 1033                  | 948                   | 810.76                      | ± 24.8   |
| D-CDP1  | 201.09                | 166.24                | 189.88                | 185.74                      | ± 17.8   |
| D-CDP7  | 1851                  | 2012                  | 1991                  | 1951.3                      | ± 87.5   |

## References

[1] Elfgen, A.; Hupert, M.; Bochinsky, K.; Tusche, M.; González de San Román Martín, E.; Gering, I.; Sacchi, S.; Pollegioni, L.; Huesgen, P.F.; Hartmann, R.; Santiago-Schübel, B. Metabolic resistance of the D-peptide RD2 developed for direct elimination of amyloid- $\beta$  oligomers. *Sci. Rep.* 2019, 9, 1-13.
